# Supplementary material for: Attentional and affective consequences of technology supported mindfulness training: a randomised, active control, efficacy trial
Source: PubMed Central journal article supplement (PMC5127005; doi:10.1186/s40359-016-0168-6), 2016-11-29
Supplement: 40359_2016_168_MOESM2_ESM.pdf [file 40359_2016_168_MOESM2_ESM.pdf]

*Daily Experience Sampling Items*

1. *Pleasantness*. I feel \_\_\_\_\_ after completing today's session. (Very Unpleasant / Very Pleasant)
2. *Emotional Activity*. I feel \_\_\_\_\_ after completing today's session. (Inactive / Very Active)
3. *Focus*. I was \_\_\_\_\_ during today's session. (Very Distracted / Very Focused)
4. *Feedback*.  
  
*MT*: I felt the wind feedback was \_\_\_\_\_ of mind wandering during today's session. (Very Unreflective / Very Reflective)  
  
*Control*: I felt the level of instruction was \_\_\_\_\_ during today's session. (Very Unhelpful / Very Helpful)
5. *Effort*. I put in \_\_\_\_\_ effort during today's session. (A Little / Very Much)
6. *Calmness*. I feel \_\_\_\_\_ now than I did before today's session. (Less Calm / More Calm)
7. *Body Awareness*. I feel \_\_\_\_\_ to my body right now. (Very Disconnected / Very Connected)
8. *Stress*. Today was \_\_\_\_\_ stressful. (Not at All / Extremely)
